# Supplementary material for: Recent development in the design of artificial enzymes through molecular imprinting technology
Source: Royal Society of Chemistry journal article supplement (doi:10.1039/d2tb00276k), 2022-01-01
Supplement: d2tb00276k1.pdf [file d2tb00276k1.pdf]

Table S1: Summary of the main MIPs-based artificial enzymes in this review.

| Enzyme-like activity            | Template                                                          | Substrate                | Active center                        | Imprinting factor | Activity enhancement/fold (MIP/NIP) | Ref. |
|---------------------------------|-------------------------------------------------------------------|--------------------------|--------------------------------------|-------------------|-------------------------------------|------|
| Peroxidase-like                 | Homovanillic acid                                                 | Homovanillic acid        | hemin                                | 3.32              | 71.03                               | 51   |
| Peroxidase-like                 | Homovanillic acid                                                 | Homovanillic acid        | hemin                                | 2.38              | 6.38                                | 53   |
| Carbonic Anhydrase-like         | CO <sub>2</sub>                                                   | CO <sub>2</sub>          | Zn(II) ions mediated complex         | _____             | _____                               | 54   |
| Phosphotriesterase-like         | Methyl parathion                                                  | Methyl parathion         | Zn(II) ions mediated complex         | _____             | 414.89                              | 56   |
| Carboxypeptidase A-like         | Amidphenyl-2-pyridyl-phosphateinium                               | Diphenyl carbonate       | Zn(II) ions mediated complex         | 61.5              | 3200                                | 64   |
| Carboxypeptidase A-like         | Amidphenyl-2-pyridyl-phosphateinium                               | Diphenyl carbonate       | Cu(II) ions mediated complex         | 49.0              | 8015                                | 65   |
| Carboxypeptidase A-like         | Amidphenyl-2-pyridyl-phosphateinium                               | Di-(2-pyridyl)-carbonate | Cu(II) ions mediated complex         | 53.8              | 217 000                             | 66   |
| Chymotrypsin-like               | Phenyl-1-(N-benzyloxycarbonylamino)-2-(phenyl)ethyl phosphonate   | Z-1-Phe-PNA              | Hydroxyl, imidazole, carboxyl groups | 4.22              | 75.38                               | 67   |
| Chymotrypsin-like               | Phenyl-1-(N-benzyloxycarbonylamino)-4-methoxybenzyl phosphonate   | Z-Phe-PNP                | Imidazole groups                     | 1.37              | 12.43                               | 68   |
| Chymotrypsin-like               | Phenyl-1-(N-benzyloxycarbonylamino)-2-(phenyl)ethyl phosphonate   | Z-L-Phe-Gly-OH           | Hydroxyl, imidazole, carboxyl groups | 43.22             | 1666.16                             | 69   |
| Organophosphorus hydrolase-like | 1-(diethoxyphosphorylmethyl)-4-nitrobenzene                       | Paraoxon-ethyl           | Zn(II) ions mediated complex         | _____             | 14 (than natural OPH)               | 70   |
| Atrazine transforming activity  | Allyl 4-ethylamino-6-isopropylamino-1,3,5-triazine-2-yl disulfide | Atrazine                 | Sulfonic acid, methacrylic acid      | _____             | _____                               | 76   |
| Glycosidases-like               | 2-Aminophenyl-β-D-                                                | Glucose                  | Carboxyl                             | 177               | _____                               | 77   |

|                                 |                                           |                 |                       |       |                                            |    |
|---------------------------------|-------------------------------------------|-----------------|-----------------------|-------|--------------------------------------------|----|
| Organophosphorus hydrolase-like | glucopyranoside<br>Ethyl-parathion        | Ethyl-parathion | Ag(I) complexes       | 2.4   | 12000 (than self-hydrolysis)               | 80 |
| Photocatalytic activity         | Ketoprofen                                | Ketoprofen      | Zr-O cluster          | 4.74  | _____                                      | 87 |
| Glucosidase-like                | 4-Aminophenyl- $\beta$ -D-glucopyranoside | Cellulose       | Carboxyl groups       | >450  | (Several times than commercial cellulases) | 96 |
| Epoxide oxidase-like            | T1                                        | Styrene         | peroxycarboxylic acid | _____ | _____                                      | 97 |

Table S2: Summary of the main nanozyme@MIPs in this review.

| Nanozyme                                                                   | Enzyme-like activity      | Template      | Substrate     | $k_{cat}/K_m$ ( $s^{-1} \mu M^{-1}$ ) |                                 |                      | Ref. |
|----------------------------------------------------------------------------|---------------------------|---------------|---------------|---------------------------------------|---------------------------------|----------------------|------|
|                                                                            |                           |               |               | MIP                                   | NIP                             | Bare                 |      |
| Fe <sub>3</sub> O <sub>4</sub>                                             | Peroxide-like             | TMB           | TMB           | $6.8 \times 10^{-2}$                  | $2.2 \times 10^{-2}$            | $2.4 \times 10^{-2}$ | 90   |
| Fe <sub>3</sub> O <sub>4</sub>                                             | Peroxide-like             | MB            | MB            | _____                                 | _____                           | _____                | 110  |
| AuNPs                                                                      | Glucose Oxidase-like      | Glucose       | Glucose       | $447.7 \times 10^{-3}$                | $15.3 \times 10^{-3}$           | $1.7 \times 10^{-3}$ | 111  |
| DNAzyme                                                                    | Peroxide-like             | Amplex Red    | Amplex Red    | (Km)<br>1.8 $\mu$ M                   | (Km)<br>8.5 $\mu$ M             | (Km)<br>5.5 $\mu$ M  | 112  |
| GO-Fe(III) complex                                                         | Cytochrome c oxidase-like | Cr(VI) ions   | Cr(VI) ions   | $5.8 \times 10^{-7}$                  | $6.7 \times 10^{-8}$            | _____                | 113  |
| CoA-HSD nanofibers                                                         | Hydrolase-like            | <i>p</i> -NPA | <i>p</i> -NPB | (Activity)<br>155.4 $\mu$ M/min       | (Activity)<br>155.4 $\mu$ M/min | _____                | 119  |
| AMIP-H nanofibers                                                          | Hydrolase-like            | <i>p</i> -NPA | <i>p</i> -NPA | $2.6 \times 10^{-7}$                  | $1.4 \times 10^{-7}$            | $0.9 \times 10^{-7}$ | 120  |
| HNE/BSA-Cu <sub>3</sub> (PO <sub>4</sub> ) <sub>2</sub> ·3H <sub>2</sub> O | Elastase-like             | Interleukin-6 | Interleukin-6 | _____                                 | _____                           | _____                | 123  |
